# Supplementary material for: Distilling Professional Opinion to Gauge Vulnerability of Guam Avifauna to Brown Treesnake Predation
Source: Frontiers journal article supplement (doi:10.3389/fcosc.2021.683964), 2021-07-08
Supplement: Table_1.XLSX [file Table_1.XLSX]

## Sheet: Read me
	tal
	Brown Treesnake Threat Survey [Phase 1]
	Created by | Robert M. McElderry [mcelderryr@triton.uog.edu]
	September 2020
	THE MAJORITY OF RESPONSES REQUIRE ONLY AN 'X' OR A SELECTION FROM A NUMBER SCALE
	Survey overview | We developed this survey in an effort to evaluate the relative risks posed by BTS to each of seven candidates for reintroduction to the island of Guam. In this survey, we will ask you to answer a series of questions, in which you will use your judgement to rate various dimensions of risk associated with all bird species about whom you feel knowledgeable. Our goal is to find cons…
	Dimensions of BTS predation | We divide BTS predation risk into two dimensions, encounter and consumption. Although encounter rates between birds and BTS are subject to a multitude of considerations, we will estimate encounter rates relative to a baseline rate determined by the contact rate at live lure camera traps in an area. In questions 2 through 4, we will ask you to help us identify what tr…
	rcuogmcelderry

## Sheet: Survey
				Brown Treesnake Threat Survey				Created by | Robert M. McElderry [mcelderryr@triton.uog.edu]						October 2020
	Purpose |			To solicit expert opinion concerning seven bird species once native to Guam and their vulnerability to Brown Treesnake.													Count answers
	Directions |			Based on your knowledge, please answer each of the following questions the best of your ability. If you have no knowledge or informed opinion concerning the answer to a question, please indicate so by selecting the last option 'no idea' or enter 'na'. When complete, the tallies to the right will be green.
														0	Questions Answered
														71	Questions Remaining
Level of Expertise	Q1	For each of the following bird species and one snake, please rank your level of expertise concerning their behavior and life history. [Type an x in a single box per row]						Expert	Very familiar	Somewhat familiar	Barely familiar	No knowledge
			a	Ko'ko'	Guam Rail	Gallirallus owstoni							select one				0
			b	Åga	Mariana Crow	Corvus kubaryi							select one				0
			c	Totot	Mariana Fruit-Dove	Ptilinopus roseicapilla							select one				0
			d	Såli	Micronesian Starling	Aplonis opaca							select one				0
			e	Sihek	Micronesian Kingfisher	Todiramphus cinnamominus							select one				0
			f	Chichirika	Rufous Fantail	Rhipidura rufifrons							select one				0
			g	Nosa'	Bridled White-eye	Zosterops conspicillatus							select one				0
			h	BTS	Brown Treesnake	Boiga irregularis							select one				0
Encounter Rate	Q2	Do you know of any predator avoidance traits that would decrease the chances of a bird being encountered by a Brown Treesnake? [Type an x in a single box per row]						Yes	No	No idea		Don't worry about hidden text. I'll extract all information
											If yes, please list a few
			a	Ko'ko'	Guam Rail	Gallirallus owstoni									select one		0
			b	Åga	Mariana Crow	Corvus kubaryi									select one		0
			c	Totot	Mariana Fruit-Dove	Ptilinopus roseicapilla									select one		0
			d	Såli	Micronesian Starling	Aplonis opaca									select one		0
			e	Sihek	Micronesian Kingfisher	Todiramphus cinnamominus									select one		0
			f	Chichirika	Rufous Fantail	Rhipidura rufifrons									select one		0
			g	Nosa'	Bridled White-eye	Zosterops conspicillatus									select one		0
Encounter Rate	Q3	Please rank these birds from most likely to be encountered (1) by a Brown Treesnake down to least likely to be encountered (7). [Type a number in each row, or mark "No idea"]						Rank 1 to 7	No idea
			a	Ko'ko'	Guam Rail	Gallirallus owstoni				select one							0
			b	Åga	Mariana Crow	Corvus kubaryi				select one							0
			c	Totot	Mariana Fruit-Dove	Ptilinopus roseicapilla				select one							0
			d	Såli	Micronesian Starling	Aplonis opaca				select one							0
			e	Sihek	Micronesian Kingfisher	Todiramphus cinnamominus				select one							0
			f	Chichirika	Rufous Fantail	Rhipidura rufifrons				select one							0
			g	Nosa'	Bridled White-eye	Zosterops conspicillatus				select one							0
Encounter Rate	Q4	Relative to a baseline BTS encounter rate, how likely is each bird to be encountered by Brown Treesnake? [Type an x in a single box per row]						Way less than baseline	Less than baseline	Baseline	more than baseline	Way more than baseline	No idea
			a	Ko'ko'	Guam Rail	Gallirallus owstoni								select one			0
			b	Åga	Mariana Crow	Corvus kubaryi								select one			0
			c	Totot	Mariana Fruit-Dove	Ptilinopus roseicapilla								select one			0
			d	Såli	Micronesian Starling	Aplonis opaca								select one			0
			e	Sihek	Micronesian Kingfisher	Todiramphus cinnamominus								select one			0
			f	Chichirika	Rufous Fantail	Rhipidura rufifrons								select one			0
			g	Nosa'	Bridled White-eye	Zosterops conspicillatus								select one			0
Consumption Risk	Q5	Do you know of any predator defense traits that would decrease the chances of a bird being killed by a mature Brown Treesnake [1050 to 1200 mm SVL] once encountered? [Type an x in a single box per row]						Yes	No	No idea		Don't worry about hidden text. I'll extract all information
											If yes, please list a few
			a	Ko'ko'	Guam Rail	Gallirallus owstoni									select one		0
			b	Åga	Mariana Crow	Corvus kubaryi									select one		0
			c	Totot	Mariana Fruit-Dove	Ptilinopus roseicapilla									select one		0
			d	Såli	Micronesian Starling	Aplonis opaca									select one		0
			e	Sihek	Micronesian Kingfisher	Todiramphus cinnamominus									select one		0
			f	Chichirika	Rufous Fantail	Rhipidura rufifrons									select one		0
			g	Nosa'	Bridled White-eye	Zosterops conspicillatus									select one		0
Consumption Risk	Q6	Please rank these birds from most likely to survive (1) an encounter with a mature Brown Treesnake down to least likely to survive (7). [Type a number in each row, or mark "No idea"]						Rank 1 to 7	No idea
			a	Ko'ko'	Guam Rail	Gallirallus owstoni				select one							0
			b	Åga	Mariana Crow	Corvus kubaryi				select one							0
			c	Totot	Mariana Fruit-Dove	Ptilinopus roseicapilla				select one							0
			d	Såli	Micronesian Starling	Aplonis opaca				select one							0
			e	Sihek	Micronesian Kingfisher	Todiramphus cinnamominus				select one							0
			f	Chichirika	Rufous Fantail	Rhipidura rufifrons				select one							0
			g	Nosa'	Bridled White-eye	Zosterops conspicillatus				select one							0
Consumption Risk	Q7	For each bird species, which life stage is most vulnerable in an encounter with a mature Brown Treesnake [1050 to 1200 mm]? (1=most vulnerable, 3= least vulnerable) [Type an number between 1 and 3 in each box]						Eggs	Nestlings	Fledlings	Juveniles	Adult	Adult on nest
			a	Ko'ko'	Guam Rail	Gallirallus owstoni								fill in all cells			0
			b	Åga	Mariana Crow	Corvus kubaryi								fill in all cells			0
			c	Totot	Mariana Fruit-Dove	Ptilinopus roseicapilla								fill in all cells			0
			d	Såli	Micronesian Starling	Aplonis opaca								fill in all cells			0
			e	Sihek	Micronesian Kingfisher	Todiramphus cinnamominus								fill in all cells			0
			f	Chichirika	Rufous Fantail	Rhipidura rufifrons								fill in all cells			0
			g	Nosa'	Bridled White-eye	Zosterops conspicillatus								fill in all cells			0
Consumption Risk	Q8	When an adult bird is encountered by a mature Brown Treesnake [1050 to 1200 mm], which family members would also be at risk of predation? [Type an x in each box per row to indicate every family member at risk]						Eggs & Nestlings	Fledlings	Dependent juveniles	Adult partner
			a	Ko'ko'	Guam Rail	Gallirallus owstoni						select one or more					0
			b	Åga	Mariana Crow	Corvus kubaryi						select one or more					0
			c	Totot	Mariana Fruit-Dove	Ptilinopus roseicapilla						select one or more					0
			d	Såli	Micronesian Starling	Aplonis opaca						select one or more					0
			e	Sihek	Micronesian Kingfisher	Todiramphus cinnamominus						select one or more					0
			f	Chichirika	Rufous Fantail	Rhipidura rufifrons						select one or more					0
			g	Nosa'	Bridled White-eye	Zosterops conspicillatus						select one or more					0
Consumption Risk	Q9	Relative to the adult bird initially encountered by a mature Brown Treesnake, how much risk of predation is there for the partner of the encountered bird? [Type a single x per row]						Same risk	Less risk	Half risk	Much less risk	No risk at all	No idea
			a	Ko'ko'	Guam Rail	Gallirallus owstoni								select one			0
			b	Åga	Mariana Crow	Corvus kubaryi								select one			0
			c	Totot	Mariana Fruit-Dove	Ptilinopus roseicapilla								select one			0
			d	Såli	Micronesian Starling	Aplonis opaca								select one			0
			e	Sihek	Micronesian Kingfisher	Todiramphus cinnamominus								select one			0
			f	Chichirika	Rufous Fantail	Rhipidura rufifrons								select one			0
			g	Nosa'	Bridled White-eye	Zosterops conspicillatus								select one			0
Consumption Risk	Q10	Given an encounter with a mature Brown Treesnake, how likely would it be that a fledged bird (juvenile and adult) might escape predation? [Type an x in a single box per row]						1 Certain survival	2 Likely survival	3 Equal chances	4 Likely Death	5 Certain Death	No idea
			a	Ko'ko'	Guam Rail	Gallirallus owstoni								select one			0
			b	Åga	Mariana Crow	Corvus kubaryi								select one			0
			c	Totot	Mariana Fruit-Dove	Ptilinopus roseicapilla								select one			0
			d	Såli	Micronesian Starling	Aplonis opaca								select one			0
			e	Sihek	Micronesian Kingfisher	Todiramphus cinnamominus								select one			0
			f	Chichirika	Rufous Fantail	Rhipidura rufifrons								select one			0
			g	Nosa'	Bridled White-eye	Zosterops conspicillatus								select one			0
Consumtion Risk	Q11	Based on the snake size class, assign a relative mortality risk for fledged birds (juvenile and adult) during a BTS encounter. Follow the scale in Q10 and enter 1 to 5 to indicate increasing risk of death. [1=certain survival, 2=likely survival, 3=equal chances, 4=likely death, 5=certain death]						BTS Stage	Hatchling	Juvenile	Maturing	Adult	Lg Adult	X-Lg Adult
								BTS Diet	Almost exclusively lizards	Start taking rodents & birds	Reliably take rodents & birds	Prefer rodents & birds	Require rodents & birds	Require rodents & birds
								SVL (mm)	350-700	700-900	900-1050	1050-1200	1200-1500	>1500
								Mass (g)	8-35	35-70	70-125	125-200	200-500	>500
			a	Ko'ko'	Guam Rail	Gallirallus owstoni									fill in all cells		0
			b	Åga	Mariana Crow	Corvus kubaryi									fill in all cells		0
			c	Totot	Mariana Fruit-Dove	Ptilinopus roseicapilla									fill in all cells		0
			d	Såli	Micronesian Starling	Aplonis opaca									fill in all cells		0
			e	Sihek	Micronesian Kingfisher	Todiramphus cinnamominus									fill in all cells		0
			f	Chichirika	Rufous Fantail	Rhipidura rufifrons									fill in all cells		0
			g	Nosa'	Bridled White-eye	Zosterops conspicillatus									fill in all cells		0
Comments	Q12	Is there additional information that would be relevant to our inquiry and that you would like to share about one or more birds? [Please type your thoughts/opinions in the space provided, or if you are so inclined, more comprehensive responsed can be provided in a separate document.]
			a	Ko'ko'	Guam Rail	Gallirallus owstoni
			b	Åga	Mariana Crow	Corvus kubaryi
			c	Totot	Mariana Fruit-Dove	Ptilinopus roseicapilla
			d	Såli	Micronesian Starling	Aplonis opaca
			e	Sihek	Micronesian Kingfisher	Todiramphus cinnamominus
			f	Chichirika	Rufous Fantail	Rhipidura rufifrons
			g	Nosa'	Bridled White-eye	Zosterops conspicillatus
